# Supplementary material
Source: Springer Nature journal article supplement (https://www.springermedizin.de/resource/supplementary/12913_2010_1804_MOESM2_ESM.PDF/9528932)
Supplement: MOESM2 [file 9528932]

## **Additional File 2: Qualitative Data Collection Using On-Line Pro Forma - Questions Asked**

1. Name and Institution
2. Please tell us about the implementation/integration problem you worked through using the 16-question NPT tool
3. What was your overall impression of the 16-question NPT tool?
4. In relation to the QUESTIONS, were there any particular questions that were difficult to answer or think with? Please explain why and/or outline any changes you would make.
5. In relation to the DESCRIPTIONS, were there any particular descriptions that were difficult to answer or think with? Please explain why and/or outline any changes you would make.
6. What could we do to improve the current version of the 16-question NPT tool?
7. How familiar are you with NPT?
8. Could you give us some context about how you used the 16-question NPT tool? For example: how long you worked with the 16-question NPT tool; whether you used it alone or with others; if with others, how familiar were they with NPT; did you consult specific resources to answer the questions or just from memory; and anything else you think might be useful.
